# Supplementary material
Source: PubMed Central journal article supplement (PMC6290096)

Figure S1

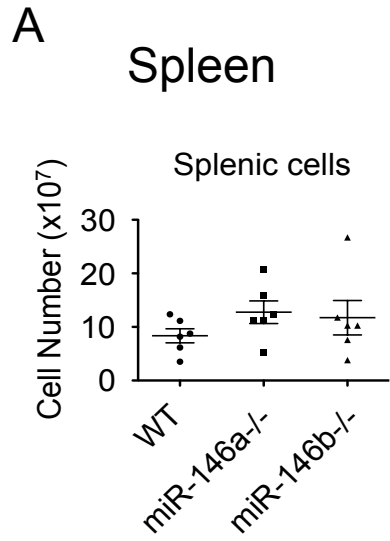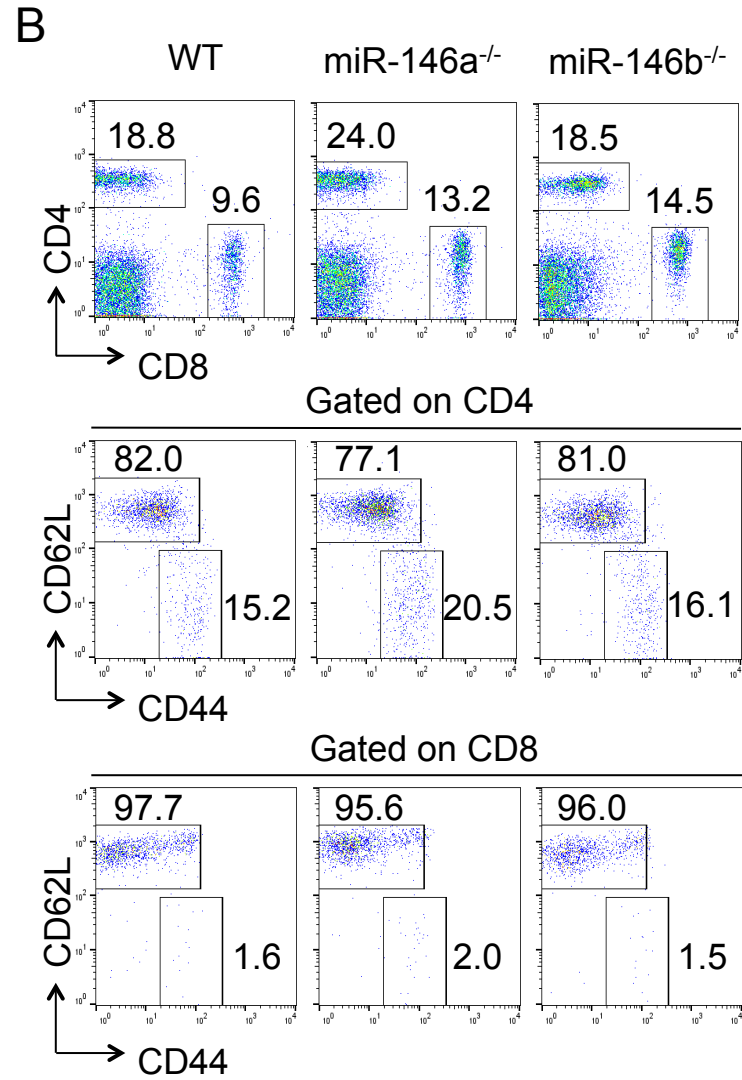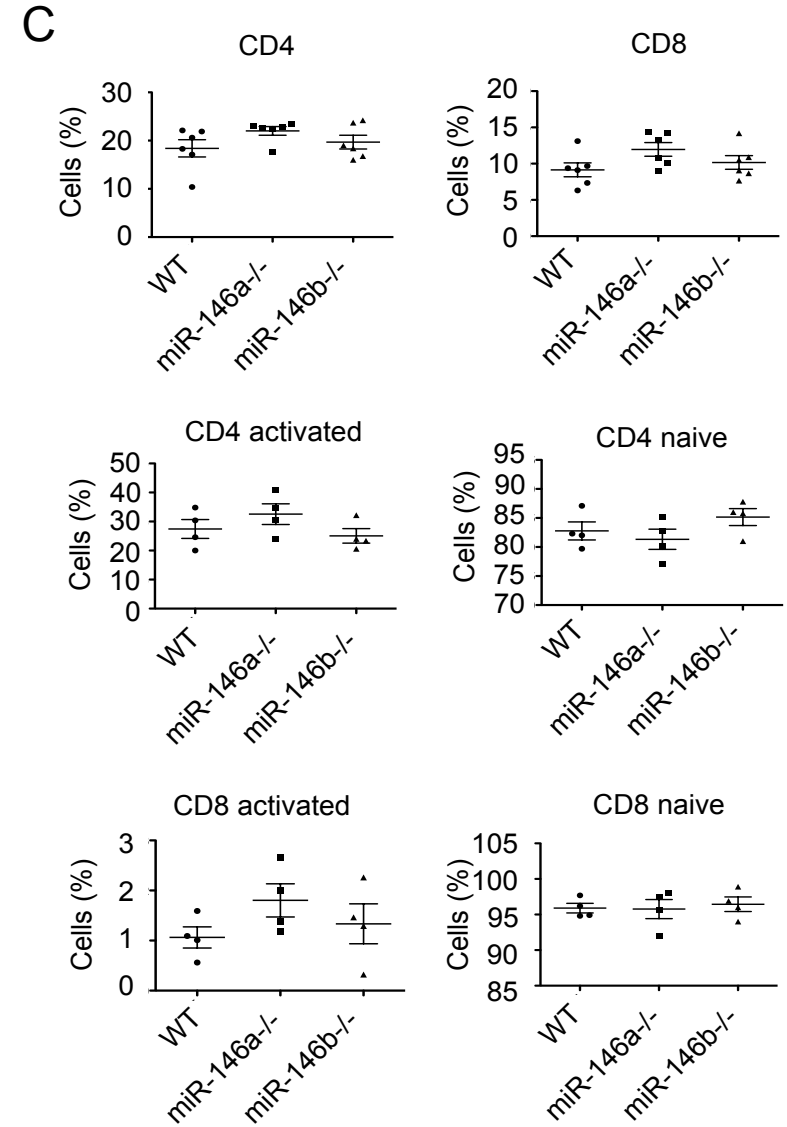

Figure S2

A

Spleen

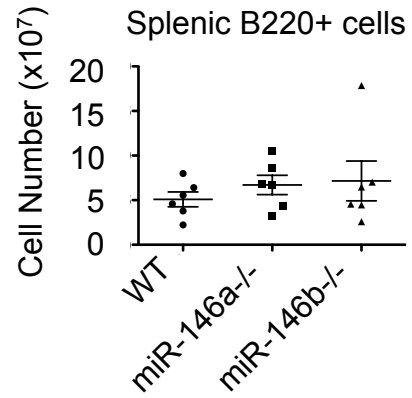

B

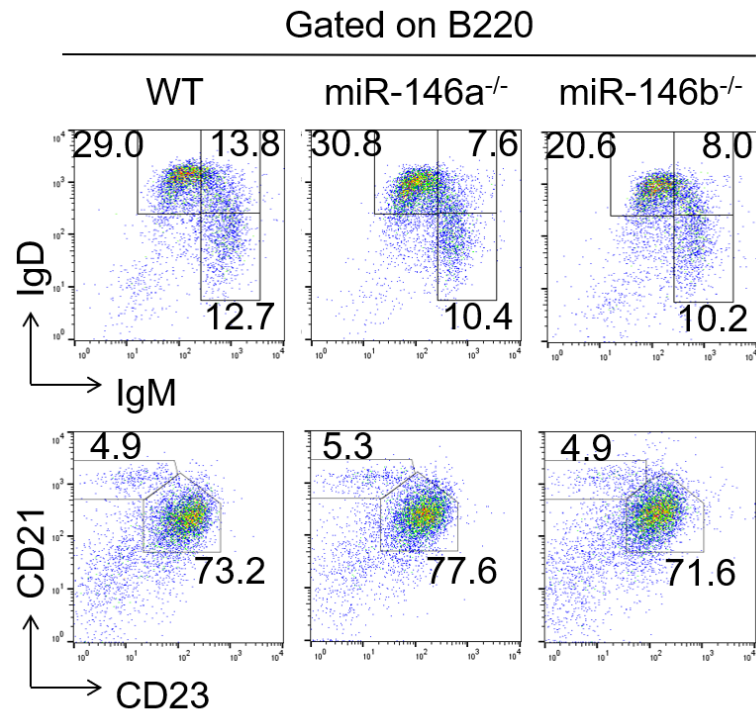

C

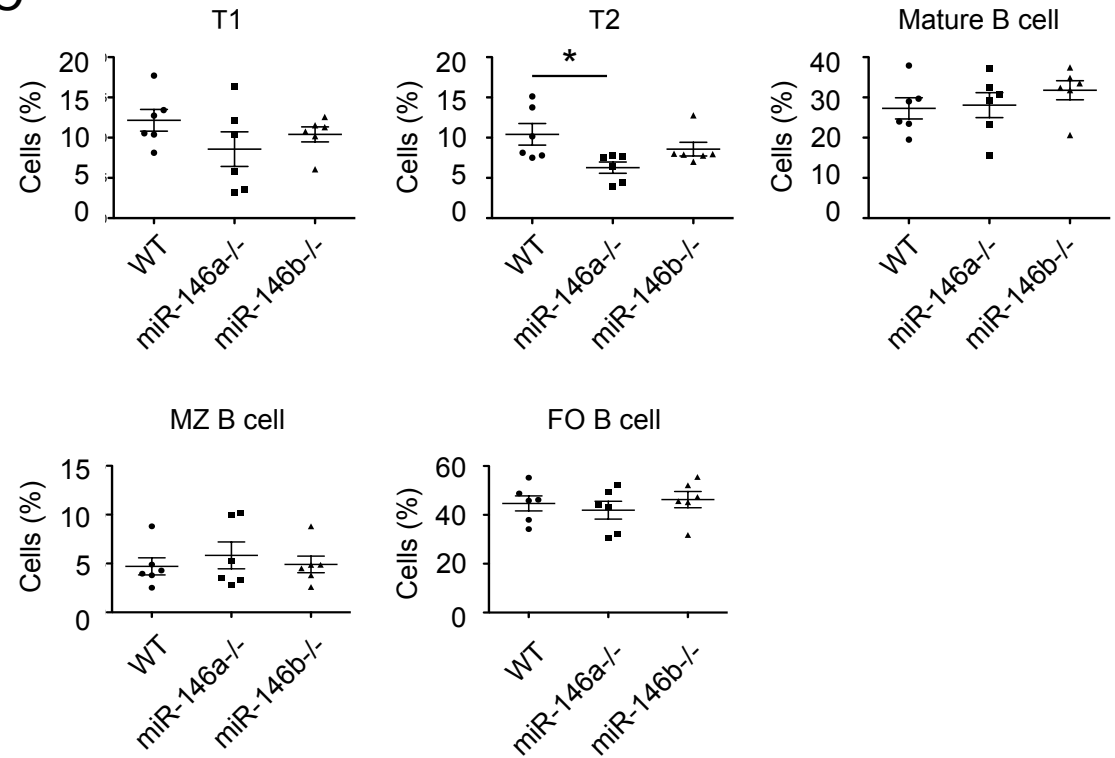

Figure S3

A

Bone Marrow

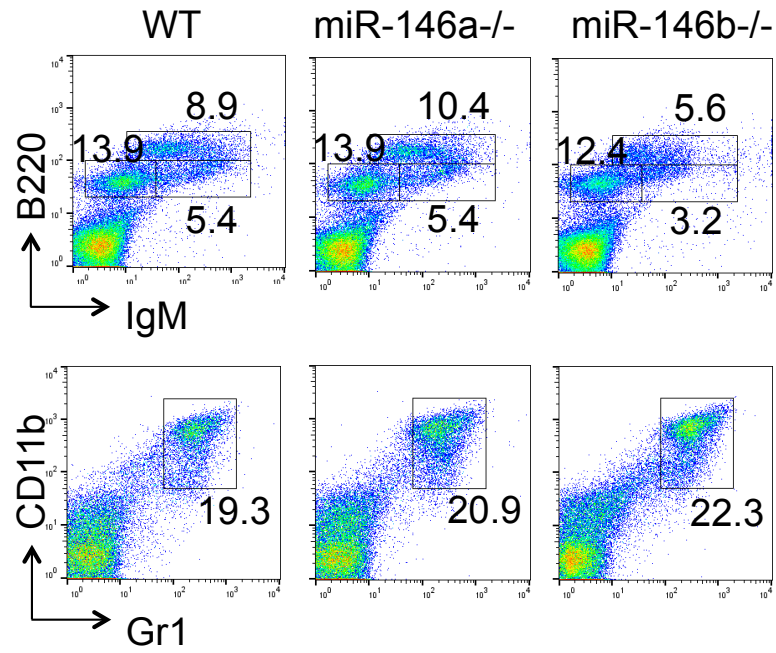

B

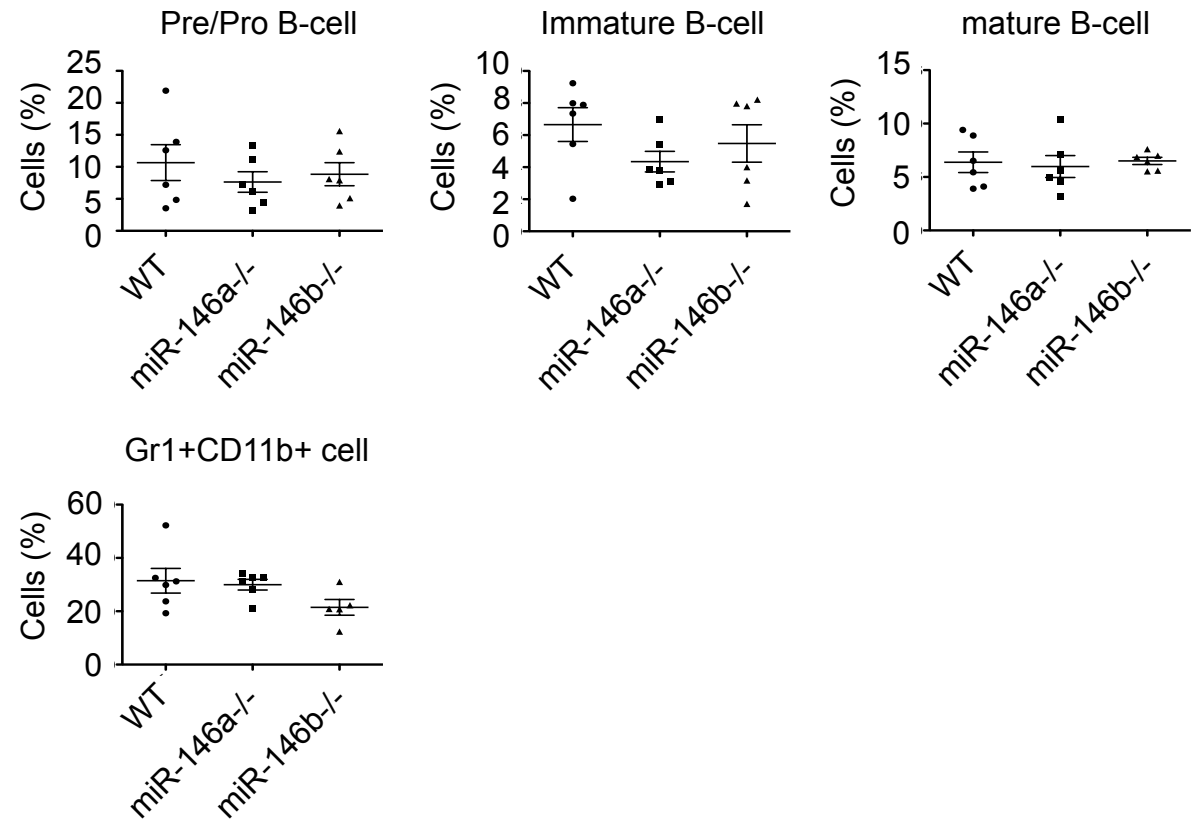

Figure S4

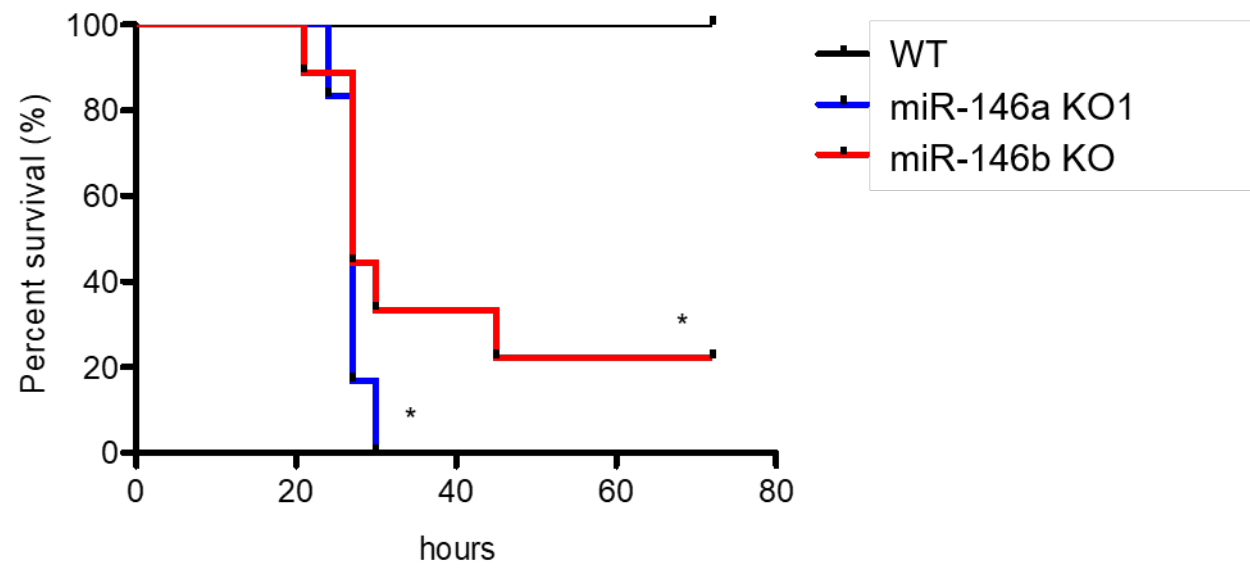

Figure S5

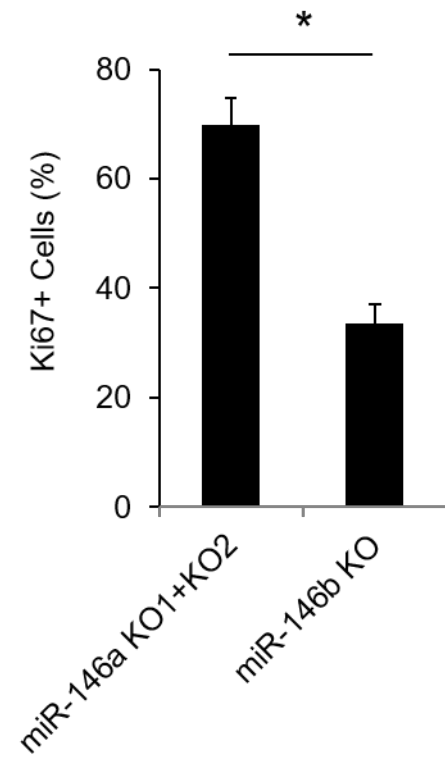

Figure S6

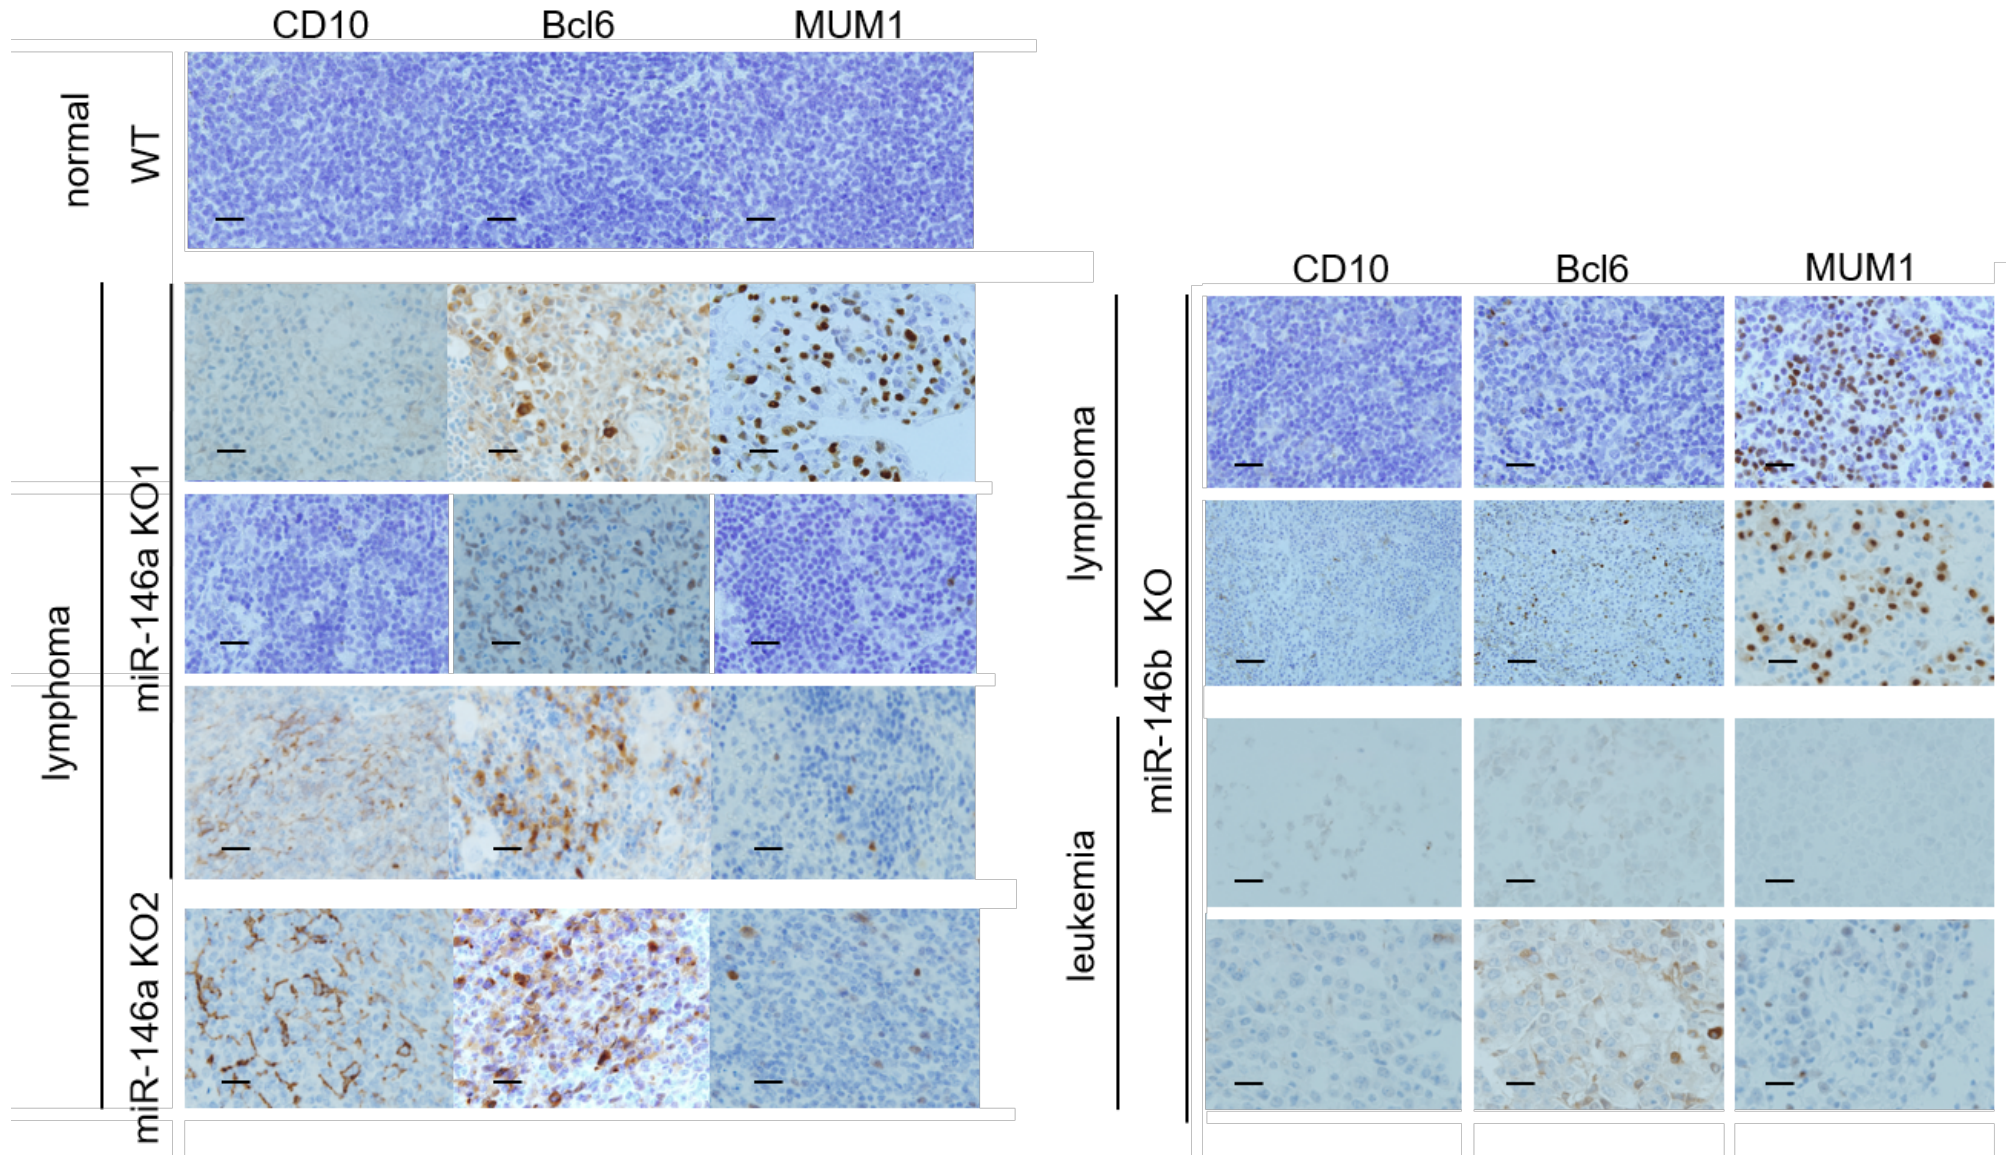

Figure S7

A

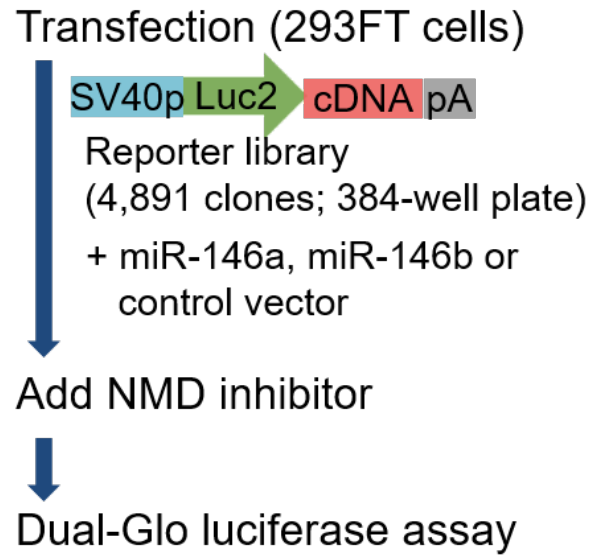

B

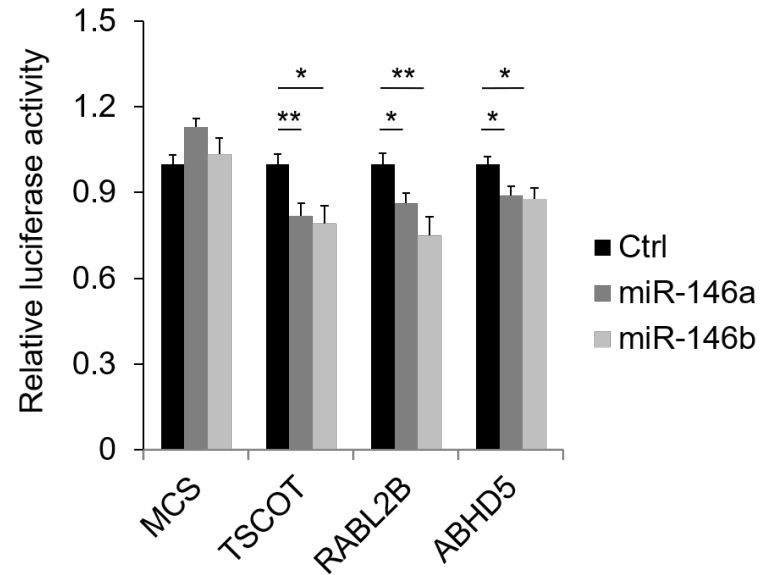

C

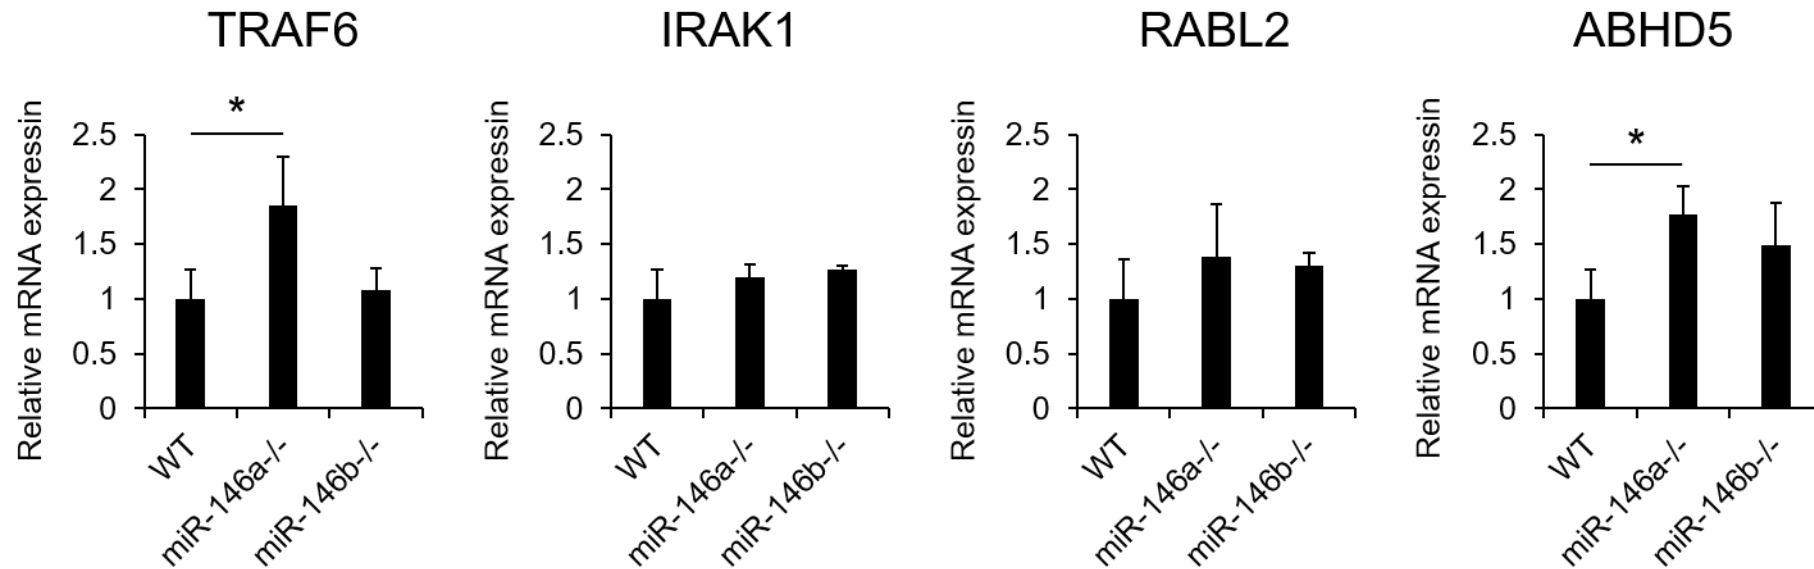

Supplement: ba017954-suppl2.pdf [file ba017954-suppl2.pdf]
